# Supplementary material
Source: MDPI journal article supplement (https://www.mdpi.com/2073-4395/10/9/1331)
Supplement: s1 [file s1]

## Sheet: Data - LandUseZagreb
LandUse	Water holding capacity (%vol)	Bulk density (g cm-3)	Air filled porosity (%vol)	Organic matter (%)	Soil organic carbon stocks (t ha-1)	Sand (%)	Silt (%)	Clay (%)	Infiltration (mm ha-1)	Aggregate stability (%)
Vineyard	24.6	1.68	5.77	1.26641	19.9163	40.5	39.3	20.2	59.4	60
Vineyard	40.4	1.32	2.19057	1.16853	16.1568	41.6	38.5	19.9	72	61.1111
Vineyard	41	1.352	1.07358	1.48678	21.1222	38.6	42.1	19.3	111.24	64.1026
Vineyard	25.9	1.633	2.81132	1.82823	27.0517	40.8	39.2	20	40.32	60.5263
Vineyard	10.2	1.748	4.2	1.2351	18.9465	53.8	26.1	20.1	47.16	70.2703
Vineyard	42.1	1.366	5.62	1.66176	27.5962	41.3	39	19.7	326.16	63.8889
Vineyard	38.6	1.417	4.78302	1.54286	22.3354	40.5	40	19.5	228.96	56.4103
Vineyard	41.6	1.367	5.85	1.30676	19.1745	39.8	40.3	19.9	107.64	49.9738
Cropland	38.1	1.547	3.52264	1.01016	16.0817	56.2	34.2	9.6	167.04	58.8235
Cropland	37.2	1.557	4.04528	1.40015	22.2903	55.6	34.2	10.2	118.08	51.4286
Cropland	39.7	1.435	6.14906	1.4569	20.5763	52.4	36.5	11.1	38.16	68.5714
Cropland	38.96	1.497	4.54	1.44048	21.5639	55.8	33.8	10.4	23.256	70.5882
Cropland	40.26	1.45	4.99	1.40931	20.4444	56	33.2	10.8	56.52	75
Cropland	37.83	1.54	4.07	0.986439	15.1879	55.8	34	10.2	30.132	51.4286
Cropland	41.1	1.535	0.975472	1.42364	21.5776	55.3	34	10.7	64.08	69.2308
Cropland	40.6	1.506	2.57	0.936452	14.103	55.3	34.3	10.4	50.24	65.22
Orchard	48.3	1.22	12.0038	2.02257	24.6147	27.2	41.8	31	640.8	90
Orchard	52.3	1.206	9.78868	1.95539	23.595	27.4	41.8	30.8	202.32	92.5
Orchard	52.7	1.225	7.98113	1.95558	23.1802	30.4	40.2	29.4	61.2	90
Orchard	53	1.171	12.4774	1.86192	21.5486	27.8	41.6	30.6	210.6	90
Orchard	45.16	1.34	23.8377	1.60172	21.4897	27.6	41.8	30.6	161.28	77.5
Orchard	51.6	1.13	6.35283	4.33812	49.1798	27.4	41.8	30.8	104.4	92.5
Orchard	52.5	1.132	7.9283	4.81893	54.8715	28	41.8	30.2	103.32	92.5
Orchard	51.05	1.142	6.81509	4.46	49.15	27.2	42	30.8	111.57	92.5
Forest	49.03	0.99	13.4	4.31409	42.9395	43.5	45.9	10.6	378	92.3077
Forest	44.16	0.916	21.26	5.35706	49.0707	46	42.8	11.2	319.68	89.7436
Forest	45.33	1.05	14.67	3.19761	33.884	48.9	40.5	10.6	576	78.9474
Forest	41.96	1.06	17.87	3.91891	41.7103	45	43.9	11.1	158.76	83.3333
Forest	41.63	1.048	18.8	5.85319	61.3609	45.6	43.7	10.7	381.6	91.8919
Forest	40.03	0.986	22.74	5.51875	54.4333	44.3	45.1	10.6	215.28	91.6667
Forest	42.86	1.138	14.18	3.71496	42.2763	47.3	42	10.7	163.08	89.4737
Forest	44.8	0.983	18.1057	4.67086	46.1481	43.9	45.3	10.8	824.4	92.1053
